# Supplementary material for: Synthesis of an original fluorinated triethylene glycol methacrylate monomer and its radical copolymerisation with vinylidene fluoride. Its application as a gel polymer electrolyte for Li-ion batteries
Source: Royal Society of Chemistry journal article supplement (doi:10.1039/c5py00732a), 2015-01-01
Supplement: c5py00732a1.pdf [file c5py00732a1.pdf]

Cite this: DOI: 10.1039/c0xx00000x

www.rsc.org/xxxxxx

## Supporting Information

### Synthesis of an Original MAFTEG Monomer and its Radical Copolymerization with Vinylidene Fluoride. Application as Polymer Electrolyte Gel for Li-Ion Batteries

Ali Alaaeddine,<sup>a</sup> Jérôme Vergnaud,<sup>a</sup> Julien Rolland,<sup>b</sup> Alexandru Vlad,<sup>b</sup> Jean-François Gohy,<sup>b</sup> Bruno Ameduri,<sup>a\*</sup>

5 Received (in XXX, XXX) Xth XXXXXXXXXX 20XX, Accepted Xth XXXXXXXXXX 20XX

DOI: 10.1039/b000000x

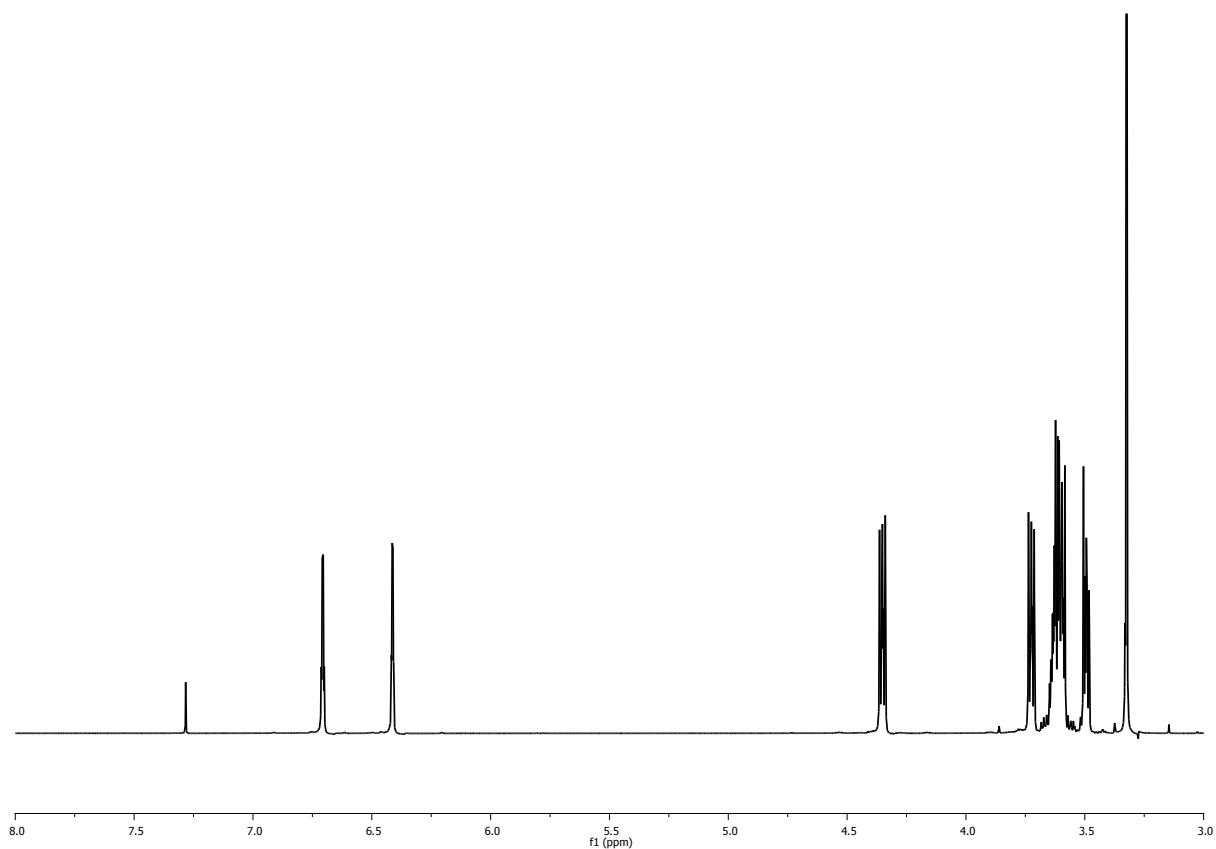

Figure S1: <sup>1</sup>H NMR spectrum (CDCl<sub>3</sub>, 400 MHz, room temperature) of MAFTEG monomer

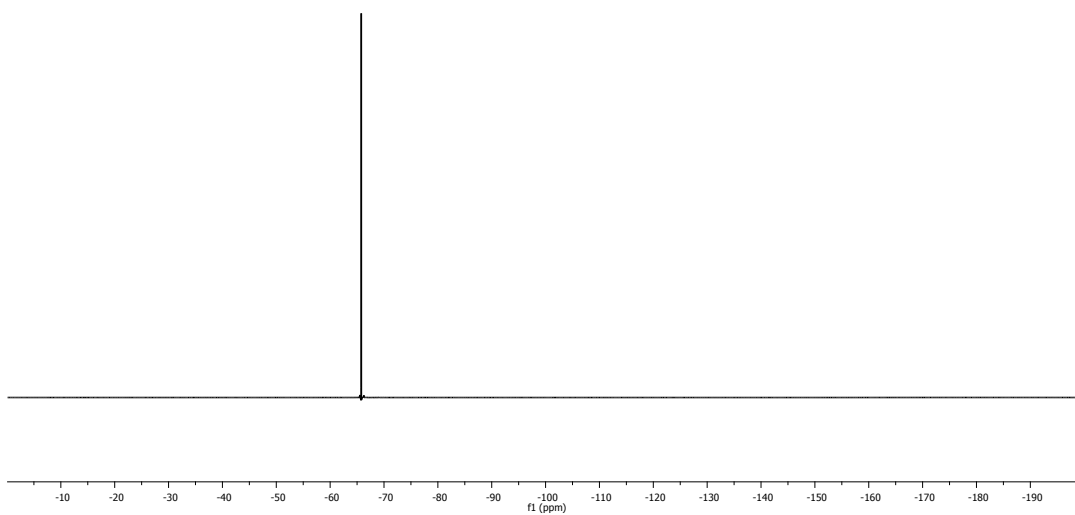

Figure S2:  $^{19}\text{F}\{^1\text{H}\}$  NMR spectrum ( $\text{CDCl}_3$ , 376 MHz, room temperature) of MAFTEG monomer

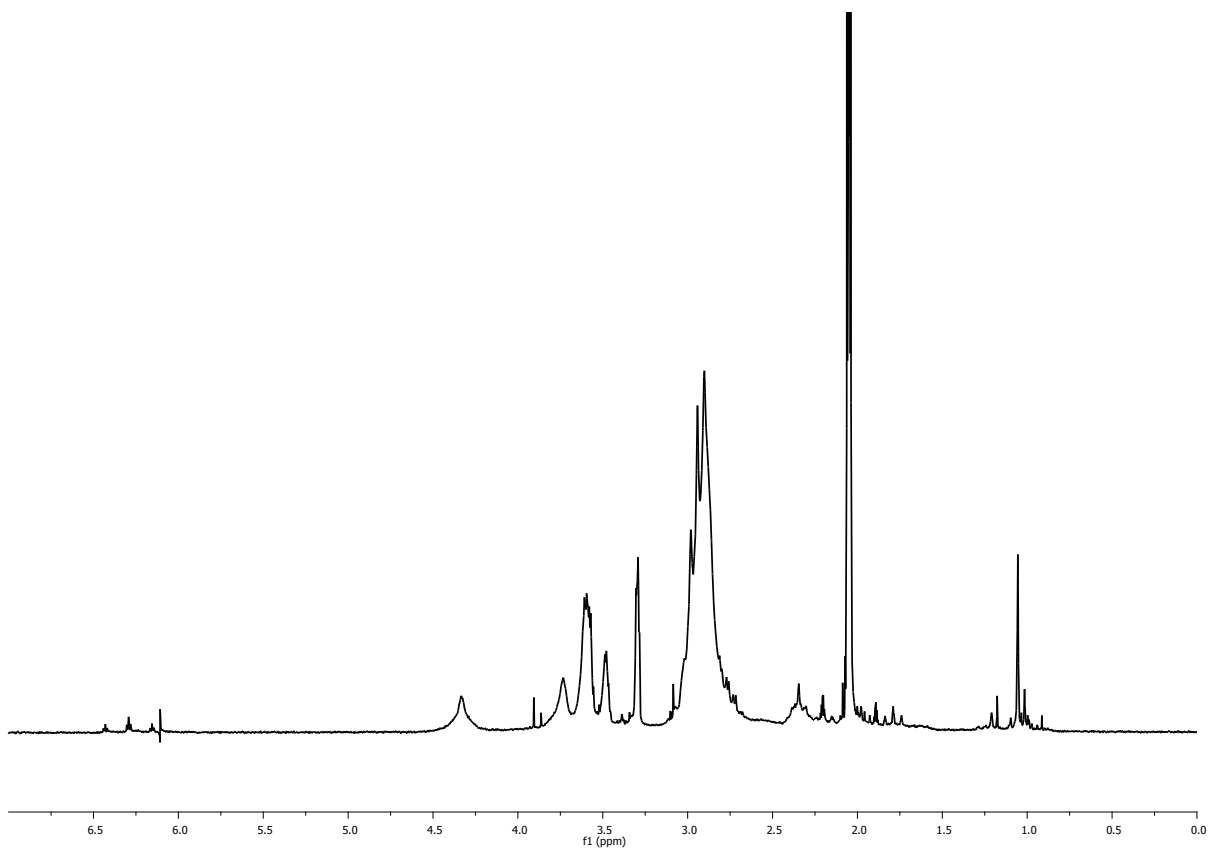

Figure S3:  $^1\text{H}$  NMR spectrum (acetone  $\text{D}_6$ , 400 MHz) of a 89/11 poly(VDF-*co*-MAFTEG) copolymer

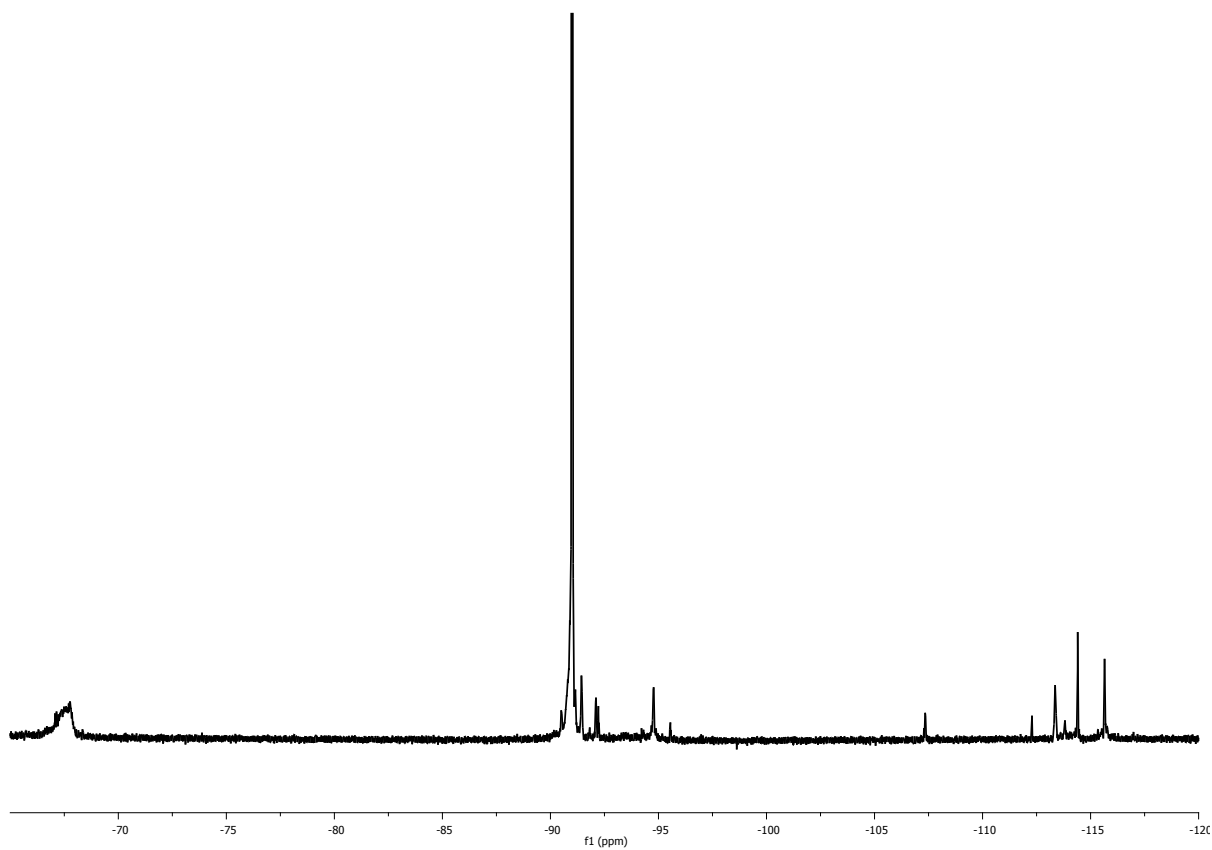

Figure S4:  $^{19}\text{F}\{^1\text{H}\}$  NMR spectrum (acetone  $\text{D}_6$ , 376 MHz) of 89/11 poly(VDF-*co*-MAFTEG) copolymer

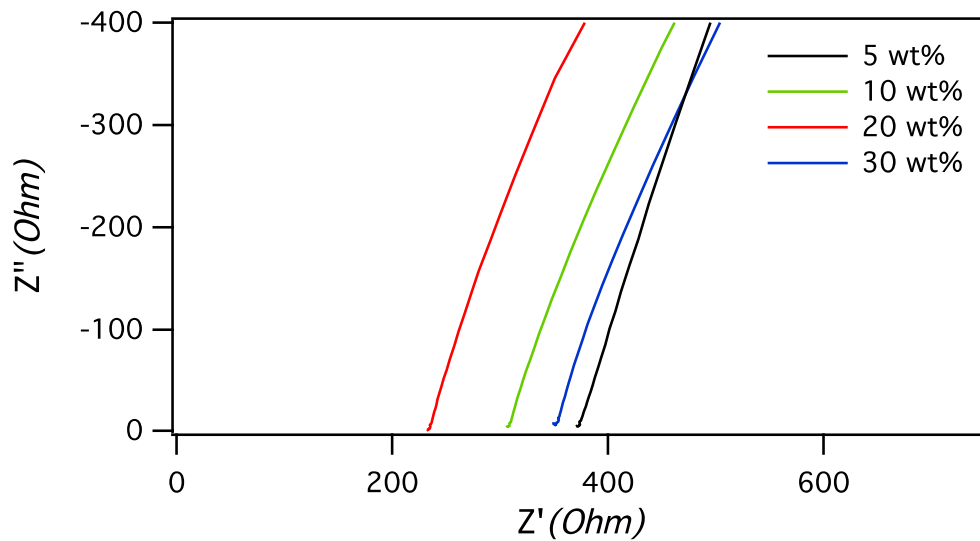

Figure S5: Nyquist plot of ionic liquid P(VDF-co-MAFTEG) copolymer (9 mol% MAFTEG) gel polymer electrolyte at several silica contents.
